# Supplementary material for: Associations between circulating obesity-related biomarkers and prognosis in female breast cancer survivors: a systematic review of observational data in women enrolled in lifestyle intervention trials
Source: PubMed Central journal article supplement (PMC9673384; doi:10.1186/s12885-022-10274-3), 2022-11-18
Supplement: 12885_2022_10274_MOESM2_ESM.pdf [file 12885_2022_10274_MOESM2_ESM.pdf]

## Search Strategy for Meyer, et al.

### OBSERVATIONAL STUDIES

#### EMBASE

URL: <https://www.embase.com/login#advancedSearch/default>

Date: 26.08.20

#### Keywords:

('Breast tumor '/exp OR 'breast neoplas\*':ti,ab,kw OR 'breast cancer\*':ti,ab,kw OR 'breast tumor\*':ti,ab,kw OR 'breast carcinoma\*':ti,ab,kw OR 'mammary cancer\*':ti,ab,kw OR 'mammary tumor\*':ti,ab,kw OR 'mammary neoplas\*':ti,ab,kw OR 'mammary carcinoma\*':ti,ab,kw) AND ('Cancer survivor '/exp OR survivor\*':ti,ab,kw OR 'Aftercare '/exp OR aftercare:ti,ab,kw OR 'Recurrent disease '/exp OR recurrence\*':ti,ab,kw) AND ('Biological marker'/exp OR biomarker\*':ti,ab,kw OR 'biological marker\*':ti,ab,kw OR 'serum marker\*':ti,ab,kw OR 'clinical marker\*':ti,ab,kw OR 'plasma marker\*':ti,ab,kw OR 'blood marker\*':ti,ab,kw OR 'Insulin '/exp OR insulin:ti,ab,kw OR glucose:ti,ab,kw OR 'Cytokine '/exp OR cytokine\*':ti,ab,kw OR adipokine\*':ti,ab,kw OR adipocytokine\*':ti,ab,kw OR 'leptin '/exp OR leptin:ti,ab,kw OR adiponectin:ti,ab,kw OR resistin:ti,ab,kw OR cardiovascular:ti,ab,kw OR 'metabolic profile\*':ti,ab,kw OR 'Metabolomics '/exp OR metabolomic\*':ti,ab,kw) AND ('Recurrent disease '/exp OR recurrence\*':ti,ab,kw OR 'Prognosis '/exp OR prognos\*':ti,ab,kw OR 'Mortality '/exp OR mortality:ti,ab,kw OR 'survival '/exp OR survival:ti,ab,kw) AND ('Body Weight '/exp OR 'body weight' OR overweight OR 'obesity '/exp OR obes\* OR adipo\* OR 'Body Mass '/exp OR 'body mass index' OR 'Metabolic Syndrome X '/exp OR 'metabolic syndrome' OR 'Inflammation '/exp OR 'inflammat\*')

Filters used: none

Reference count: 2012

#### PubMed

URL: <https://www.ncbi.nlm.nih.gov/pubmed/advanced>

Date: 26.08.20

#### Keywords:

(Breast Neoplasms [Mesh] OR breast neoplas\* [Title/Abstract] OR breast cancer\* [Title/Abstract] OR breast tumor\* [Title/Abstract] OR breast carcinoma\* [Title/Abstract] OR mammary cancer\* [Title/Abstract] OR mammary tumor\* [Title/Abstract] OR mammary neoplas\* [Title/Abstract] OR mammary carcinoma\* [Title/Abstract] OR breast neoplas\* [Text Word] OR breast cancer\* [Text Word] OR breast tumor\* [Text Word] OR breast carcinoma\* [Text Word] OR mammary cancer\* [Text Word] OR mammary tumor\* [Text Word] OR mammary neoplas\* [Text Word] OR mammary carcinoma\* [Text Word]) AND (Cancer survivors [Mesh] OR survivor\* [Title/Abstract] OR survivor\* [Text Word] OR Aftercare [Mesh] OR aftercare [Title/Abstract] OR aftercare [Text Word] OR Recurrence [Mesh] OR recurrence\* [Title/Abstract] OR recurrence\* [Text Word]) AND (Biomarkers [Mesh] OR biomarker\* [Title/Abstract] OR biological marker\* [Title/Abstract] OR serum marker\* [Title/Abstract] OR clinical marker\* [Title/Abstract] OR plasma marker\* [Title/Abstract] OR blood marker\* [Title/Abstract] OR biomarker\* [Text Word] OR biological marker\* [Text Word] OR serum marker\* [Text Word] OR clinical marker\* [Text Word] OR plasma marker\* [Text Word] OR blood marker\* [Text Word] OR Insulin [Mesh])

OR insulin [Title/Abstract] OR insulin [Text Word] OR glucose [Title/Abstract] OR glucose [Text Word] OR Adipokines [Mesh] OR adipokine\* [Title/Abstract] OR adipocytokine\* [Title/Abstract] OR leptin [Title/Abstract] OR adiponectin [Title/Abstract] OR resistin [Title/Abstract] OR adipokine\* [Text Word] OR adipocytokine\* [Text Word] OR leptin [Text Word] OR adiponectin [Text Word] OR resistin [Text Word] OR Cytokines [Mesh] or cytokine\* [Title/Abstract] OR cardiovascular [Title/Abstract] OR metabolic profile\* [Title/Abstract] OR Metabolomics [Mesh] OR metabolomic\* [Title/Abstract] OR cytokine\* [Text Word] OR cardiovascular [Text Word] OR metabolic profile\* [Text Word] OR metabolomic\* [Text Word]) AND (Recurrence [Mesh] OR recurrence\* [Title/Abstract] OR Prognosis [Mesh] OR prognos\* [Title/Abstract] OR Mortality [Mesh] OR mortality [Title/Abstract] OR survival [Mesh] OR survival [Title/Abstract] OR recurrence\* [Text Word] OR prognos\* [Text Word] OR mortality [Text Word] OR survival [Text Word]) AND (Body Weight [Mesh] OR body weight [all] OR overweight [all] OR obes\* [all] OR adipo\* [all] OR Body Mass Index [Mesh] OR body mass index [all] OR Metabolic Syndrome [Mesh] OR metabolic syndrome [all] OR Inflammation [Mesh] OR inflammat\* [all])

Filters used: None

Reference count: 654

## **COCHRANE LIBRARY**

URL: <https://www.cochranelibrary.com/advanced-search/search-manager>

Date: 26.08.20

### keywords:

(MeSH descriptor: [Breast Neoplasms] explode all trees OR (breast neoplas\*):ti,ab,kw OR (breast cancer\*):ti,ab,kw OR (breast tumor\*):ti,ab,kw OR (breast carcinoma\*):ti,ab,kw OR (mammary cancer\*):ti,ab,kw OR (mammary tumor\*):ti,ab,kw OR (mammary neoplas\*):ti,ab,kw OR (mammary carcinoma\*):ti,ab,kw) AND (MeSH descriptor: [Cancer Survivors] explode all trees OR (survivor\*):ti,ab,kw OR MeSH descriptor: [Recurrence] explode all trees OR (recurrence\*):ti,ab,kw OR MeSH descriptor: [Aftercare] explode all trees OR (aftercare):ti,ab,kw) AND (MeSH descriptor: [Biomarkers] explode all trees OR (biomarker\*):ti,ab,kw OR (biological marker\*):ti,ab,kw OR (serum marker\*):ti,ab,kw OR (clinical marker\*):ti,ab,kw OR (plasma marker\*):ti,ab,kw OR (blood marker\*):ti,ab,kw OR MeSH descriptor: [Insulins] explode all trees OR (insulin):ti,ab,kw OR (glucose):ti,ab,kw OR MeSH descriptor: [Adipokines] explode all trees OR (adipokine\*):ti,ab,kw OR (adipocytokine\*):ti,ab,kw OR (leptin):ti,ab,kw OR (adiponectin):ti,ab,kw OR (resistin):ti,ab,kw OR MeSH descriptor: [Cytokines] explode all trees OR (cytokine):ti,ab,kw OR (cardiovascular):ti,ab,kw OR (metabolic profile\*):ti,ab,kw OR MeSH descriptor: [Metabolomics] explode all trees OR (metabolomic\*):ti,ab,kw) AND (MeSH descriptor: [Recurrence] explode all trees OR (recurrence):ti,ab,kw OR MeSH descriptor: [Prognosis] explode all trees OR (Prognos\*):ti,ab,kw OR MeSH descriptor: [Mortality] explode all trees OR (mortality):ti,ab,kw OR MeSH descriptor: [Survival] explode all trees OR (survival):ti,ab,kw) AND (MeSH descriptor: [Body Weight] explode all trees OR (body weight):ti,ab,kw OR (overweight):ti,ab,kw OR (obes\*):ti,ab,kw OR (adipo\*):ti,ab,kw OR MeSH descriptor: [Body Mass Index] explode all trees OR (body mass index):ti,ab,kw OR MeSH descriptor: [Metabolic Syndrome] explode all trees OR (metabolic syndrome):ti,ab,kw OR MeSH descriptor: [Inflammation] explode all trees OR (inflammat\*):ti,ab,kw)

Filters used: none

Reference count: 260

## **INTERVENTION STUDIES**

### **EMBASE**

URL: <https://www.embase.com/login#advancedSearch/default>

Date: 26.08.20

#### Keywords:

('Breast tumor '/exp OR "breast neoplas\*":ti,ab,kw OR "breast cancer\*":ti,ab,kw OR "breast tumor\*":ti,ab,kw OR "breast carcinoma\*":ti,ab,kw OR "mammary cancer\*":ti,ab,kw OR "mammary tumor\*":ti,ab,kw OR "mammary neoplas\*":ti,ab,kw OR "mammary carcinoma\*":ti,ab,kw) AND ('Cancer survivor '/exp OR survivor\*:ti,ab,kw OR 'Aftercare '/exp OR aftercare:ti,ab,kw OR 'Recurrent disease '/exp OR recurrence\*:ti,ab,kw) AND ('Biological marker'/exp OR biomarker\*:ti,ab,kw OR "biological marker\*":ti,ab,kw OR "serum marker\*":ti,ab,kw OR "clinical marker\*":ti,ab,kw OR "plasma marker\*":ti,ab,kw OR "blood marker\*":ti,ab,kw OR 'Insulin '/exp OR insulin:ti,ab,kw OR glucose:ti,ab,kw OR 'Cytokine '/exp OR cytokine\*:ti,ab,kw OR adipokine\*:ti,ab,kw OR adipocytokine\*:ti,ab,kw OR 'leptin '/exp OR leptin:ti,ab,kw OR adiponectin:ti,ab,kw OR resistin:ti,ab,kw OR cardiovascular:ti,ab,kw OR "metabolic profile\*":ti,ab,kw OR 'Metabolomics '/exp OR metabolomic\*:ti,ab,kw) AND ('Caloric Restriction '/exp OR "caloric restriction\*":ti,ab,kw OR 'Exercise '/exp OR exercis\*:ti,ab,kw OR 'physical activity '/exp OR "physical activity":ti,ab,kw OR 'Diet '/exp OR diet\*:ti,ab,kw OR 'diet therapy '/exp OR nutrition\*:ti,ab,kw OR 'body weight loss '/exp OR "weight loss":ti,ab,kw OR "weight change\*":ti,ab,kw OR "weight reduction\*":ti,ab,kw OR 'Lifestyle '/exp OR lifestyle:ti,ab,kw OR 'health behavior '/exp OR behavior\*:ti,ab,kw)

Filters used: none

Reference #: 1732

### **PubMed**

URL: <https://www.ncbi.nlm.nih.gov/pubmed/advanced>

Date: 26.08.20

#### Keywords:

(Breast Neoplasms [Mesh] OR breast neoplas\* [Title/Abstract] OR breast cancer\* [Title/Abstract] OR breast tumor\* [Title/Abstract] OR breast carcinoma\* [Title/Abstract] OR mammary cancer\* [Title/Abstract] OR mammary tumor\* [Title/Abstract] OR mammary neoplas\* [Title/Abstract] OR mammary carcinoma\* [Title/Abstract] OR breast neoplas\* [Text Word] OR breast cancer\* [Text Word] OR breast tumor\* [Text Word] OR breast carcinoma\* [Text Word] OR mammary cancer\* [Text Word] OR mammary tumor\* [Text Word] OR mammary neoplas\* [Text Word] OR mammary carcinoma\* [Text Word]) AND (Cancer survivors [Mesh] OR survivor\* [Title/Abstract] OR survivor\* [Text Word] OR Aftercare [Mesh] OR aftercare [Title/Abstract] OR aftercare [Text Word] OR Recurrence [Mesh] OR recurrence\* [Title/Abstract] OR recurrence\* [Text Word]) AND (Biomarkers [Mesh] OR biomarker\* [Title/Abstract] OR biological marker\* [Title/Abstract] OR serum marker\* [Title/Abstract] OR clinical

marker\* [Title/Abstract] OR plasma marker\* [Title/Abstract] OR blood marker\* [Title/Abstract] OR biomarker\* [Text Word] OR biological marker\* [Text Word] OR serum marker\* [Text Word] OR clinical marker\* [Text Word] OR plasma marker\* [Text Word] OR blood marker\* [Text Word] OR Insulin [Mesh] OR insulin [Title/Abstract] OR insulin [Text Word] OR glucose [Title/Abstract] OR glucose [Text Word] OR Adipokines [Mesh] OR adipokine\* [Title/Abstract] OR adipocytokine\* [Title/Abstract] OR leptin [Title/Abstract] OR adiponectin [Title/Abstract] OR resistin [Title/Abstract] OR adipokine\* [Text Word] OR adipocytokine\* [Text Word] OR leptin [Text Word] OR adiponectin [Text Word] OR resistin [Text Word] OR Cytokines [Mesh] OR cytokine\* [Title/Abstract] OR cardiovascular [Title/Abstract] OR metabolic profile\* [Title/Abstract] OR Metabolomics [Mesh] OR metabolomic\* [Title/Abstract] OR cytokine\* [Text Word] OR cardiovascular [Text Word] OR metabolic profile\* [Text Word] OR metabolomic\* [Text Word] AND (Caloric Restriction [Mesh] OR caloric restriction\* [Title/Abstract] OR Exercise [Mesh] OR exercis\* [Title/Abstract] OR physical activity [Title/Abstract] OR Diet [Mesh] OR diet\* [Title/Abstract] OR nutrition therapy [Mesh] OR nutrition\* [Title/Abstract] OR Weight Loss [Mesh] OR weight loss [Title/Abstract] OR weight change\* [Title/Abstract] OR weight reduction\* [Title/Abstract] OR Life style [Mesh] OR lifestyle [Title/Abstract] OR health behavior [Mesh] OR behavior\* [Title/Abstract] OR caloric restriction\* [Text Word] OR exercis\* [Text Word] OR physical activity [Text Word] OR diet\* [Text Word] OR nutrition\* [Text Word] OR weight loss [Text Word] OR weight change\* [Text Word] OR weight reduction\* [Text Word] OR lifestyle [Text Word] OR behavior\* [Text Word])

Filters used: None

Reference #: 793

## **COCHRANE LIBRARY**

URL: <https://www.cochranelibrary.com/advanced-search/search-manager>

Date: 26.08.20

### **Keywords:**

(MeSH descriptor: [Breast Neoplasms] explode all trees OR (breast neoplas\*):ti,ab,kw OR (breast cancer\*):ti,ab,kw OR (breast tumor\*):ti,ab,kw OR (breast carcinoma\*):ti,ab,kw OR (mammary cancer\*):ti,ab,kw OR (mammary tumor\*):ti,ab,kw OR (mammary neoplas\*):ti,ab,kw OR (mammary carcinoma\*):ti,ab,kw) AND (MeSH descriptor: [Cancer Survivors] explode all trees OR (survivor\*):ti,ab,kw OR MeSH descriptor: [Aftercare] explode all trees OR (aftercare):ti,ab,kw OR MeSH descriptor: [Recurrence] explode all trees OR (recurrence\*):ti,ab,kw) AND (MeSH descriptor: [Biomarkers] explode all trees OR (biomarker\*):ti,ab,kw OR (biological marker\*):ti,ab,kw OR (serum marker\*):ti,ab,kw OR (clinical marker\*):ti,ab,kw OR (plasma marker\*):ti,ab,kw OR (blood marker\*):ti,ab,kw OR MeSH descriptor: [Insulins] explode all trees OR (insulin):ti,ab,kw OR (glucose):ti,ab,kw OR MeSH descriptor: [Adipokines] explode all trees OR (adipokine\*):ti,ab,kw OR (adipocytokine\*):ti,ab,kw OR (leptin):ti,ab,kw OR (adiponectin):ti,ab,kw OR (resistin):ti,ab,kw OR MeSH descriptor: [Cytokines] explode all trees OR (cytokine):ti,ab,kw OR (cardiovascular):ti,ab,kw OR (metabolic profile\*):ti,ab,kw OR MeSH descriptor: [Metabolomics] explode all trees OR (metabolomic\*):ti,ab,kw) AND (MeSH descriptor: [Caloric Restriction] explode all trees OR (caloric restriction\*):ti,ab,kw OR MeSH descriptor: [Exercise] explode all trees OR (exercis\*):ti,ab,kw OR (physical activity):ti,ab,kw OR MeSH descriptor: [Diet] explode all trees OR (diet\*):ti,ab,kw MeSH descriptor: [Nutrition Therapy] explode all trees OR (nutrition\*):ti,ab,kw OR

MeSH descriptor: [Weight Loss] explode all trees OR (weight loss):ti,ab,kw OR (weight change\*):ti,ab,kw  
OR (weight reduction\*):ti,ab,kw OR MeSH descriptor: [Life Style] explode all trees OR (lifestyle):ti,ab,kw  
OR MeSH descriptor: [Health Behavior] explode all trees OR (behavior\*):ti,ab,kw

Filters used: none

Reference #: 316
