# Supplementary material for: Associations between circulating obesity-related biomarkers and prognosis in female breast cancer survivors: a systematic review of observational data in women enrolled in lifestyle intervention trials
Source: PubMed Central journal article supplement (PMC9673384; doi:10.1186/s12885-022-10274-3), 2022-11-18
Supplement: 12885_2022_10274_MOESM3_ESM.pdf [file 12885_2022_10274_MOESM3_ESM.pdf]

**Meyer, et al. Additional File 3: Full-text articles excluded, with reasons (n=84)**

- No control group of interest or no true control arm (n= 7)
- No exposure of interest (n= 4)
- No intervention of interest (n=4)
- No outcome of interest (n= 8)
- Non-randomized study (n=5)
- Other (n=2)
- Narrative reviews (n=2)
- Wrong population (n=18)
- Study protocol (n=27)
- Foreign language (n=2)
- Data not available (n=1)
- Wrong study design (n=4)

|                                                              |                                                                                                                |
|--------------------------------------------------------------|----------------------------------------------------------------------------------------------------------------|
| (Adlard et al., 2019)                                        | Study protocol                                                                                                 |
| (Alfano et al., 2017)                                        | No outcome of interest                                                                                         |
| (Arikawa, Kaufman, Raatz, & Kurzer, 2018)                    | No true control arm                                                                                            |
| (Augustin et al., 2017)                                      | Wrong population – non breast cancer survivors                                                                 |
| (Azamian, Mobarekeh, Vismeh, & Gohar, 2015)                  | Paper in Arabic                                                                                                |
| (Bahl et al., 2005)                                          | Wrong population – did not fulfill inclusion criteria                                                          |
| (Befort et al., 2014)                                        | Study protocol                                                                                                 |
| (Bera et al., 2020a)                                         | Other – Corrigendum to: Proteomic Analysis of Inflammatory Biomarkers Associated With Breast Cancer Recurrence |
| (Bera et al., 2020b)                                         | Data not available – no information on breast cancer stage or timing of blood draw                             |
| (Blackburn & Wang, 2007)                                     | Wrong population - did not fulfill inclusion criteria                                                          |
| (Bobin-Dubigeon, Lefrançois, Classe, Joalland, & Bard, 2015) | Wrong population - did not fulfill inclusion criteria                                                          |
| (Bower et al., 2014)                                         | No true control arm                                                                                            |
| (Bramwell et al., 2014)                                      | Wrong population - did not fulfill inclusion criteria                                                          |
| (Calip et al., 2014)                                         | Wrong population - did not fulfill inclusion criteria                                                          |
| (Cormie et al., 2016)                                        | No intervention of interest                                                                                    |
| (Dittus et al., 2018)                                        | No outcome of interest                                                                                         |
| (Duggan et al., 2011)                                        | Wrong study design                                                                                             |
| (Duggan et al., 2013)                                        | Wrong study design                                                                                             |
| (Fujii et al., 2014)                                         | Wrong population - did not fulfill inclusion criteria                                                          |

|                                                                  |                                                                         |
|------------------------------------------------------------------|-------------------------------------------------------------------------|
| (Furberg, Veierød, Wilsgaard, Bernstein, & Thune, 2004)          | Wrong population - did not fulfill inclusion criteria                   |
| (Galanti, Stefani, & Gensini, 2013)                              | Other- description of exercise program for Breast cancer survivors      |
| (Gentry et al., 2018)                                            | Study protocol                                                          |
| (Ghosh, Hughes, Parma, Ramirez, & Li, 2014)                      | No outcome of interest                                                  |
| (Giganti et al., 2016)                                           | No outcome of interest                                                  |
| (Gnagnarella et al., 2016)                                       | Study protocol                                                          |
| (Goodwin et al., 2002)                                           | Wrong population – did not fulfill inclusion criteria                   |
| (Hutnick et al., 2005)                                           | Non-randomized study                                                    |
| (M. R. Irwin et al., 2014)                                       | No intervention of interest –Tai chi study                              |
| (M. L. Irwin et al., 2011)                                       | Wrong study design                                                      |
| (Janelins et al., 2011)                                          | No true control arm                                                     |
| (Johansen, Cintin, Jørgensen, Kamby, & Price, 1995)              | Wrong population - did not fulfill inclusion criteria                   |
| (Jones et al., 2010)                                             | No outcome of interest                                                  |
| (Knobf & Coviello, 2011)                                         | Narrative review                                                        |
| (Kus, Cinkir, Aktas, & Abali, 2019)                              | No exposure of interest                                                 |
| (Larkey, Huberty, Pedersen, & Weihs, 2016)                       | No intervention of interest – Qigong, Tai chi study                     |
| (Long Parma et al., 2015)                                        | No control arm                                                          |
| (McEligot et al., 1999)                                          | No outcome of interest                                                  |
| (Meyerhardt et al., 2020)                                        | Wrong population – cohort were breast cancer and colon cancer survivors |
| (Nelson et al., 2017)                                            | Wrong population - did not fulfill inclusion criteria                   |
| (Nock et al., 2013)                                              | Non-randomized study                                                    |
| (Nuri et al., 2014)                                              | Paper in Arabic                                                         |
| (Oh et al., 2011)                                                | Wrong population - did not fulfill inclusion criteria                   |
| (Owusu et al., 2020)                                             | Study protocol                                                          |
| (Pierce et al., 2009)                                            | Wrong study design                                                      |
| (Pudkasam et al., 2020)                                          | Study protocol                                                          |
| (Ramirez et al., 2017)                                           | Study protocol                                                          |
| (Reeves et al., 2016)                                            | Study protocol                                                          |
| (Repka & Hayward, 2018)                                          | Wrong population – did not fulfill inclusion criteria                   |
| (Rhone, Bielawski, Ziołkowska, Rość, & Ruszkowska-Ciastek, 2019) | No exposure of interest                                                 |
| (Rock et al., 2013)                                              | No control group of interest                                            |
| (Rock et al., 2008)                                              | Study protocol                                                          |
| (Rothammer, Sage, Werner, Combs, & Multhoff, 2019)               | Wrong population - did not fulfill inclusion criteria                   |
| (Sestak, Dowsett, Ferree, Baehner, & Cuzick, 2016)               | No exposure of interest                                                 |

|                                                                                                                                                                                                                                                                                                                  |                                                                       |
|------------------------------------------------------------------------------------------------------------------------------------------------------------------------------------------------------------------------------------------------------------------------------------------------------------------|-----------------------------------------------------------------------|
| (Skouroliakou et al., 2018)                                                                                                                                                                                                                                                                                      | Wrong population - did not fulfill inclusion criteria                 |
| (Sprod et al., 2012)                                                                                                                                                                                                                                                                                             | No intervention of interest – Qigong study                            |
| (Stoll, 1996)                                                                                                                                                                                                                                                                                                    | Narrative review                                                      |
| (Stolley et al., 2017)                                                                                                                                                                                                                                                                                           | No outcome of interest                                                |
| (Študentová et al., 2015)                                                                                                                                                                                                                                                                                        | No exposure of interest                                               |
| (Thomson et al., 2010)                                                                                                                                                                                                                                                                                           | No true control arm – parallel arm study                              |
| (Walter et al., 2019)                                                                                                                                                                                                                                                                                            | Non-randomized study                                                  |
| (Zhang et al., 2019)                                                                                                                                                                                                                                                                                             | Wrong population – patients with Stage IV breast cancer were included |
| 12-week Exercise Intervention Program Versus Observation in Early Stage Breast Cancer Patients on the Impact on Mental Health, Quality of Life and Immune Markers<br><a href="https://clinicaltrials.gov/show/NCT03518957">https://clinicaltrials.gov/show/NCT03518957</a>                                       | Study protocol                                                        |
| A peer support program for the long-term maintenance of physical activity and health outcomes in breast, prostate and colorectal cancer survivors<br><a href="http://www.who.int/trialsearch/Trial2.aspx?TrialID=ACTRN12618001855213">http://www.who.int/trialsearch/Trial2.aspx?TrialID=ACTRN12618001855213</a> | Study protocol                                                        |
| Avanzando Juntas: adapting an Evidence Based Weight Loss Program for Hispanic Breast Cancer Survivors<br><a href="https://clinicaltrials.gov/show/NCT04321135">https://clinicaltrials.gov/show/NCT04321135</a>                                                                                                   | Study protocol                                                        |
| Combined diet and exercise intervention among breast cancer survivors<br><a href="https://www.cochranelibrary.com/central/doi/10.1002/central/CN-01824672/full">https://www.cochranelibrary.com/central/doi/10.1002/central/CN-01824672/full</a>                                                                 | Non-randomized study, Clinical trial register                         |
| Developing a Healthy Lifestyle in Breast Cancer Survivors<br><a href="https://clinicaltrials.gov/show/NCT02677857">https://clinicaltrials.gov/show/NCT02677857</a>                                                                                                                                               | Study protocol                                                        |
| Development of exercise training regimen as second prevention for breast cancer survivors<br><a href="http://www.who.int/trialsearch/Trial2.aspx?TrialID=JPRN-UMIN000013475">http://www.who.int/trialsearch/Trial2.aspx?TrialID=JPRN-UMIN000013475</a>                                                           | Study protocol                                                        |
| Diet Composition, Weight Control, and Breast Carcinogenesis<br><a href="https://clinicaltrials.gov/show/NCT01315483">https://clinicaltrials.gov/show/NCT01315483</a>                                                                                                                                             | Non-randomized study, Clinical trial register                         |
| Exercise in Improving Health and Quality of Life in Breast Cancer Survivors<br><a href="https://clinicaltrials.gov/show/NCT03679559">https://clinicaltrials.gov/show/NCT03679559</a>                                                                                                                             | Study protocol                                                        |
| EXERCISING TOGETHER© for Couples Coping With Cancer<br><a href="https://clinicaltrials.gov/show/NCT03630354">https://clinicaltrials.gov/show/NCT03630354</a>                                                                                                                                                     | Study protocol                                                        |
| Impact of Diet and Physical Activity Changes on Body Weight, Biomarkers and Quality of Life in Breast Cancer Survivors<br><a href="https://clinicaltrials.gov/show/NCT04096469">https://clinicaltrials.gov/show/NCT04096469</a>                                                                                  | Study protocol                                                        |
| Impact of Weight Loss Interventions for Overweight Breast Cancer Survivors<br><a href="https://www.cochranelibrary.com/central/doi/10.1002/central/CN-01534191/full">https://www.cochranelibrary.com/central/doi/10.1002/central/CN-01534191/full</a>                                                            | No outcome of interest, Clinical trial register                       |
| Part II: exercise in Hispanic Breast Cancer Survivors<br><a href="https://clinicaltrials.gov/show/NCT01504789">https://clinicaltrials.gov/show/NCT01504789</a>                                                                                                                                                   | Study protocol                                                        |
| Peer Counseling for Weight Loss<br><a href="https://clinicaltrials.gov/show/NCT00120029">https://clinicaltrials.gov/show/NCT00120029</a>                                                                                                                                                                         | Study protocol                                                        |
| Physical activity adherence, psychological health and immunological outcomes (PAPHIO study) in breast cancer survivors<br><a href="http://www.who.int/trialsearch/Trial2.aspx?TrialID=ACTRN12619001271190">http://www.who.int/trialsearch/Trial2.aspx?TrialID=ACTRN12619001271190</a>                            | Study protocol                                                        |

|                                                                                                                                                                                                                                                                                                          |                                                                                 |
|----------------------------------------------------------------------------------------------------------------------------------------------------------------------------------------------------------------------------------------------------------------------------------------------------------|---------------------------------------------------------------------------------|
| Physical activity in Breast Cancer survivors: effects on physical capacity and quality of life<br><a href="http://www.who.int/trialsearch/Trial2.aspx?TrialID=RBR-3fw9xf">http://www.who.int/trialsearch/Trial2.aspx?TrialID=RBR-3fw9xf</a>                                                              | Study protocol                                                                  |
| Promoting weight loss through diet and exercise in overweight women with breast cancer<br><a href="http://www.who.int/trialsearch/Trial2.aspx?TrialID=ISRCTN53325751">http://www.who.int/trialsearch/Trial2.aspx?TrialID=ISRCTN53325751</a>                                                              | Study protocol                                                                  |
| Rx for Better Breast Health <a href="https://clinicaltrials.gov/show/NCT02279303">https://clinicaltrials.gov/show/NCT02279303</a>                                                                                                                                                                        | Study protocol                                                                  |
| The Breast Cancer Personalized Nutrition Study<br><a href="https://clinicaltrials.gov/show/NCT04079270">https://clinicaltrials.gov/show/NCT04079270</a>                                                                                                                                                  | Study protocol                                                                  |
| The effect of a long-term period interval and continuous exercise on some markers and inflammatory cytokines in breast cancer survivors<br><a href="http://www.who.int/trialsearch/Trial2.aspx?TrialID=IRCT20190731044398N2">http://www.who.int/trialsearch/Trial2.aspx?TrialID=IRCT20190731044398N2</a> | Study protocol                                                                  |
| The MATCH Study: mindfulness And Tai Chi for Cancer Health<br><a href="https://clinicaltrials.gov/show/NCT02801123">https://clinicaltrials.gov/show/NCT02801123</a>                                                                                                                                      | Study protocol                                                                  |
| Using Behavioral Economics to Achieve Improved Healthy Behavior Outcomes in Breast Cancer Survivors<br><a href="https://clinicaltrials.gov/show/NCT02938780">https://clinicaltrials.gov/show/NCT02938780</a>                                                                                             | Study protocol                                                                  |
| Weight Gain Prevention for Breast Cancer Survivors<br><a href="https://www.cochranefulltext.com/central/doi/10.1002/central/CN-01577018/full">https://www.cochranefulltext.com/central/doi/10.1002/central/CN-01577018/full</a>                                                                          | Wrong population - did not fulfill inclusion criteria – Clinical trial register |
| Weight Loss Pilot Study in Postmenopausal Breast Cancer Survivors <a href="https://clinicaltrials.gov/show/NCT02940470">https://clinicaltrials.gov/show/NCT02940470</a>                                                                                                                                  | No true control arm – parallel arm study, clinical trial register               |

## References

- Adlard, K. N., Jenkins, D. G., Salisbury, C. E., Bolam, K. A., Gomersall, S. R., Aitken, J. F., . . . Skinner, T. L. (2019). Peer support for the maintenance of physical activity and health in cancer survivors: the PEER trial - a study protocol of a randomised controlled trial. *BMC Cancer*, *19*(1), 656. doi:10.1186/s12885-019-5853-4
- Alfano, C. M., Peng, J., Andridge, R. R., Lindgren, M. E., Povoski, S. P., Lipari, A. M., . . . Janice, K. K. G. (2017). Inflammatory cytokines and comorbidity development in breast cancer survivors versus noncancer controls: Evidence for accelerated aging? *Journal of Clinical Oncology*, *35*(2), 149-156. doi:10.1200/JCO.2016.67.1883
- Arikawa, A. Y., Kaufman, B. C., Raatz, S. K., & Kurzer, M. S. (2018). Effects of a parallel-arm randomized controlled weight loss pilot study on biological and psychosocial parameters of overweight and obese breast cancer survivors. *Pilot and Feasibility Studies*, *4*(1). doi:10.1186/s40814-017-0160-9
- Augustin, L. S. A., Libra, M., Crispo, A., Grimaldi, M., De Laurentiis, M., Rinaldo, M., . . . et al. (2017). Low glycemic index diet, exercise and vitamin D to reduce breast cancer recurrence (DediCa): design of a clinical trial. *BMC cancer*, *17*(1). doi:10.1186/s12885-017-3064-4
- Azamian, A., Mobarekeh, B. G., Vismeh, Z., & Gohar, N. P. (2015). Effect of 12 weeks of selected pilates exercise training on serum adiponectin level and insulin resistance in female survivors of breast cancer and its role in prevention of recurrence. *Scientific Journal of Kurdistan University of Medical Sciences*, *20*(5), 61-73.
- Bahl, M., Ennis, M., Tannock, I. F., Hux, J. E., Pritchard, K. I., Koo, J., & Goodwin, P. J. (2005). Serum lipids and outcome of early-stage breast cancer: Results of a prospective cohort study. *Breast Cancer Research and Treatment*, *94*(2), 135-144. doi:10.1007/s10549-005-6654-9
- Befort, C. A., Klemp, J. R., Fabian, C., Perri, M. G., Sullivan, D. K., Schmitz, K. H., . . . Shireman, T. (2014). Protocol and recruitment results from a randomized controlled trial comparing group phone-based

- versus newsletter interventions for weight loss maintenance among rural breast cancer survivors. *Contemporary Clinical Trials*, 37(2), 261-271. doi:10.1016/j.cct.2014.01.010
- Bera, A., Russ, E., Srinivasan, M., Eidelman, O., Eklund, M., Hueman, M., . . . Srivastava, M. (2020a). Corrigendum to: Proteomic Analysis of Inflammatory Biomarkers Associated With Breast Cancer Recurrence. *Military medicine*. doi:10.1093/milmed/usaa082
- Bera, A., Russ, E., Srinivasan, M., Eidelman, O., Eklund, M., Hueman, M., . . . Srivastava, M. (2020b). Proteomic Analysis of Inflammatory Biomarkers Associated With Breast Cancer Recurrence. *Military medicine*, 185(1), 669-675. doi:10.1093/milmed/usz254
- Blackburn, G. L., & Wang, K. A. (2007). Dietary fat reduction and breast cancer outcome: results from the Women's Intervention Nutrition Study (WINS). *The American journal of clinical nutrition*, 86(3), s878-881.
- Bobin-Dubigeon, C., Lefrançois, A., Classe, J. M., Joalland, M. P., & Bard, J. M. (2015). Paired measurement of serum amyloid A (SAA) and paraoxonase 1 (PON1) as useful markers in breast cancer recurrence. *Clin Biochem*, 48(16-17), 1181-1183. doi:10.1016/j.clinbiochem.2015.07.020
- Bower, J. E., Greendale, G., Crosswell, A. D., Garet, D., Sternlieb, B., Ganz, P. A., . . . Cole, S. W. (2014). Yoga reduces inflammatory signaling in fatigued breast cancer survivors: a randomized controlled trial. *Psychoneuroendocrinology*, 43, 20-29. doi:10.1016/j.psyneuen.2014.01.019
- Bramwell, V. H. C., Tuck, A. B., Chapman, J. A. W., Anborgh, P. H., Postenka, C. O., Al-Katib, W., . . . Chambers, A. F. (2014). Assessment of osteopontin in early breast cancer: Correlative study in a randomised clinical trial. *Breast Cancer Research*, 16(1). doi:10.1186/bcr3600
- Calip, G. S., Malone, K. E., Gralow, J. R., Stergachis, A., Hubbard, R. A., & Boudreau, D. M. (2014). Metabolic syndrome and outcomes following early-stage breast cancer. *Breast Cancer Research and Treatment*, 148(2), 363-377. doi:10.1007/s10549-014-3157-6
- Cormie, P., Singh, B., Hayes, S., Peake, J. M., Galvão, D. A., Taaffe, D. R., . . . Newton, R. U. (2016). Acute Inflammatory Response to Low-, Moderate-, and High-Load Resistance Exercise in Women With Breast Cancer-Related Lymphedema. *Integr Cancer Ther*, 15(3), 308-317. doi:10.1177/1534735415617283
- Dittus, K. L., Harvey, J. R., Bunn, J. Y., Kokinda, N. D., Wilson, K. M., Priest, J., & Pratley, R. E. (2018). Impact of a behaviorally-based weight loss intervention on parameters of insulin resistance in breast cancer survivors. *BMC Cancer*, 18(1), 351. doi:10.1186/s12885-018-4272-2
- Duggan, C., Irwin, M. L., Xiao, L., Henderson, K. D., Smith, A. W., Baumgartner, R. N., . . . McTiernan, A. (2011). Associations of insulin resistance and adiponectin with mortality in women with breast cancer. *Journal of Clinical Oncology*, 29(1), 32-39. doi:10.1200/JCO.2009.26.4473
- Duggan, C., Wang, C. Y., Neuhouser, M. L., Xiao, L., Smith, A. W., Reding, K. W., . . . McTiernan, A. (2013). Associations of insulin-like growth factor and insulin-like growth factor binding protein-3 with mortality in women with breast cancer. *International Journal of Cancer*, 132(5), 1191-1200. doi:10.1002/ijc.27753
- Fujii, T., Yajima, R., Takada, T., Sutoh, T., Morita, H., Yamaguchi, S., . . . Kuwano, H. (2014). Serum albumin and prealbumin do not predict recurrence in patients with breast cancer. *Anticancer Res*, 34(7), 3775-3779.
- Furberg, A. S., Veierød, M. B., Wilsgaard, T., Bernstein, L., & Thune, I. (2004). Serum high-density lipoprotein cholesterol, metabolic profile, and breast cancer risk. *J Natl Cancer Inst*, 96(15), 1152-1160. doi:10.1093/jnci/djh216
- Galanti, G., Stefani, L., & Gensini, G. (2013). Exercise as a prescription therapy for breast and colon cancer survivors. *Int J Gen Med*, 6, 245-251. doi:10.2147/ijgm.s42720
- Gentry, A. L., Sereika, S. M., Casillo, F. E., Crisafio, M. E., Donahue, P. T., Grove, G. A., . . . Bender, C. M. (2018). Protocol for Exercise Program in Cancer and Cognition (EPICC): a randomized controlled trial of the

- effects of aerobic exercise on cognitive function in postmenopausal women with breast cancer receiving aromatase inhibitor therapy. *Contemporary clinical trials*.
- Ghosh, S., Hughes, D., Parma, D. L., Ramirez, A., & Li, R. (2014). Association of obesity and circulating adipose stromal cells among breast cancer survivors. *Molecular Biology Reports*, *41*(5), 2907-2916. doi:10.1007/s11033-014-3146-1
- Giganti, M. G., Tresoldi, I., Sorge, R., Melchiorri, G., Triossi, T., Masuelli, L., . . . Bei, R. (2016). Physical exercise modulates the level of serum MMP-2 and MMP-9 in patients with breast cancer. *Oncol Lett*, *12*(3), 2119-2126. doi:10.3892/ol.2016.4887
- Gnagnarella, P., Dragà, D., Baggi, F., Simoncini, M. C., Sabbatini, A., Mazzocco, K., . . . Maisonneuve, P. (2016). Promoting weight loss through diet and exercise in overweight or obese breast cancer survivors (InForma): Study protocol for a randomized controlled trial. *Trials*, *17*(1). doi:10.1186/s13063-016-1487-x
- Goodwin, P. J., Ennis, M., Pritchard, K. I., Trudeau, M. E., Koo, J., Madarnas, Y., . . . Hood, N. (2002). Fasting insulin and outcome in early-stage breast cancer: results of a prospective cohort study. *J Clin Oncol*, *20*(1), 42-51. doi:10.1200/jco.2002.20.1.42
- Hutnick, N. A., Williams, N. I., Kraemer, W. J., Orsega-Smith, E., Dixon, R. H., Bleznak, A. D., & Mastro, A. M. (2005). Exercise and lymphocyte activation following chemotherapy for breast cancer. *Med Sci Sports Exerc*, *37*(11), 1827-1835. doi:10.1249/01.mss.0000175857.84936.1a
- Irwin, M. L., Duggan, C., Wang, C. Y., Smith, A. W., McTiernan, A., Baumgartner, R. N., . . . Ballard-Barbash, R. (2011). Fasting C-peptide levels and death resulting from all causes and breast cancer: the health, eating, activity, and lifestyle study. *J Clin Oncol*, *29*(1), 47-53. doi:10.1200/jco.2010.28.4752
- Irwin, M. R., Olmstead, R., Breen, E. C., Witarama, T., Carrillo, C., Sadeghi, N., . . . et al. (2014). Tai chi, cellular inflammation, and transcriptome dynamics in breast cancer survivors with insomnia: a randomized controlled trial. *Journal of the national cancer institute. Monographs*, *2014*(50), 295-301. doi:10.1093/jncimonographs/lgu028
- Janelins, M. C., Davis, P. G., Wideman, L., Katula, J. A., Sprod, L. K., Peppone, L. J., . . . Mustian, K. M. (2011). Effects of Tai Chi Chuan on insulin and cytokine levels in a randomized controlled pilot study on breast cancer survivors. *Clinical Breast Cancer*, *11*(3), 161-170. doi:10.1016/j.clbc.2011.03.013
- Johansen, J. S., Cinton, C., Jørgensen, M., Kamby, C., & Price, P. A. (1995). Serum YKL-40: a new potential marker of prognosis and location of metastases of patients with recurrent breast cancer. *Eur J Cancer*, *31a*(9), 1437-1442. doi:10.1016/0959-8049(95)00196-p
- Jones, L. W., Douglas, P. S., Eves, N. D., Marcom, P. K., Kraus, W. E., Herndon li, J. E., . . . Peppercorn, J. (2010). Rationale and design of the Exercise Intensity Trial (EXCITE): A randomized trial comparing the effects of moderate versus moderate to high-intensity aerobic training in women with operable breast cancer. *BMC Cancer*, *10*. doi:10.1186/1471-2407-10-531
- Knobf, M. T., & Coviello, J. (2011). Lifestyle interventions for cardiovascular risk reduction in women with breast cancer. *Current Cardiology Reviews*, *7*(4), 250-257. doi:10.2174/157340311799960627
- Kus, T., Cinkir, H. Y., Aktas, G., & Abali, H. (2019). Hepatosteatosi may predict late recurrence of breast cancer: A single-center observational study. *Current Problems in Cancer*, *43*(6). doi:10.1016/j.currprobcancer.2019.01.002
- Larkey, L., Huberty, J., Pedersen, M., & Weihs, K. (2016). Qigong/Tai Chi Easy for fatigue in breast cancer survivors: Rationale and design of a randomized clinical trial. *Contemp Clin Trials*, *50*, 222-228. doi:10.1016/j.cct.2016.08.002
- Long Parma, D., Hughes, D. C., Ghosh, S., Li, R., Treviño-Whitaker, R. A., Ogden, S. M., & Ramirez, A. G. (2015). Effects of six months of Yoga on inflammatory serum markers prognostic of recurrence risk in breast cancer survivors. *Springerplus*, *4*, 143. doi:10.1186/s40064-015-0912-z

- McEligot, A. J., Rock, C. L., Flatt, S. W., Newman, V., Faerber, S., & Pierce, J. P. (1999). Plasma carotenoids are biomarkers of long-term high vegetable intake in women with breast cancer. *Journal of Nutrition*, *129*(12), 2258-2263.
- Meyerhardt, J. A., Irwin, M. L., Jones, L. W., Zhang, S., Campbell, N., Brown, J. C., . . . et al. (2020). Randomized phase II trial of exercise, metformin, or both on metabolic biomarkers in colorectal and breast cancer survivors. *JNCI cancer spectrum*, *4*(1). doi:10.1093/jncics/pkz096
- Nelson, S. H., Brasky, T. M., Patterson, R. E., Laughlin, G. A., Kritz-Silverstein, D., Edwards, B. J., . . . LaCroix, A. Z. (2017). The association of the c-reactive protein inflammatory biomarker with breast cancer incidence and mortality in the women's health initiative. *Cancer Epidemiology Biomarkers and Prevention*, *26*(7), 1100-1106. doi:10.1158/1055-9965.EPI-16-1005
- Nock, N. L., Owusu, C., Kullman, E. L., Austin, K., Roth, B., Cerne, S., . . . Berger, N. A. (2013). A Community-Based Exercise and Support Group Program in African-American Breast Cancer Survivors (ABCs). *J Phys Ther Health Promot*, *1*(1), 15-24. doi:10.18005/pthp0101003
- Nuri, R., Mahmudieh, B., Damirchi, A., Rahmani-Nia, R., Rahnama, N., & Emami, H. (2014). Changes in IGF axis and some binding proteins in postmenopausal women with breast cancer after 15 weeks of combined exercise training. *Journal of Zanjan University of Medical Sciences and Health Services*, *22*(91), 1-10.
- Oh, S. W., Park, C., Lee, E. S., Yoon, Y. S., Lee, E. S., Park, S. S., . . . Ro, J. (2011). Adipokines, insulin resistance, metabolic syndrome, and breast cancer recurrence: A cohort study. *Breast Cancer Research*, *13*(2). doi:10.1186/bcr2856
- Owusu, C., Nock, N. L., Hergenroeder, P., Austin, K., Bennet, E., Cerne, S., . . . Berger, N. A. (2020). IMPROVE, a community-based exercise intervention versus support group to improve functional and health outcomes among older African American and non-Hispanic White breast cancer survivors from diverse socioeconomic backgrounds: Rationale, design and methods. *Contemporary Clinical Trials*, *92*. doi:10.1016/j.cct.2020.106001
- Pierce, B. L., Ballard-Barbash, R., Bernstein, L., Baumgartner, R. N., Neuhaus, M. L., Wener, M. H., . . . Ulrich, C. M. (2009). Elevated biomarkers of inflammation are associated with reduced survival among breast cancer patients. *Journal of Clinical Oncology*, *27*(21), 3437-3444. doi:10.1200/JCO.2008.18.9068
- Pudkasam, S., Pitcher, M., Fisher, M., O'Connor, A., Chinlumprasert, N., Stojanovska, L., . . . Apostolopoulos, V. (2020). The PAPHIO study protocol: a randomised controlled trial with a 2 x 2 crossover design of physical activity adherence, psychological health and immunological outcomes in breast cancer survivors. *BMC Public Health*, *20*(1), 696. doi:10.1186/s12889-020-08827-x
- Ramirez, A. G., Parma, D. L., Muñoz, E., Mendoza, K. D., Harb, C., Holden, A. E. C., & Wargovich, M. (2017). An anti-inflammatory dietary intervention to reduce breast cancer recurrence risk: Study design and baseline data. *Contemporary Clinical Trials*, *57*, 1-7. doi:10.1016/j.cct.2017.03.009
- Reeves, M. M., Terranova, C. O., Erickson, J. M., Job, J. R., Brookes, D. S. K., McCarthy, N., . . . et al. (2016). Living well after breast cancer randomized controlled trial protocol: evaluating a telephone-delivered weight loss intervention versus usual care in women following treatment for breast cancer. *BMC cancer*, *16*(1). doi:10.1186/s12885-016-2858-0
- Repka, C. P., & Hayward, R. (2018). Effects of an Exercise Intervention on Cancer-Related Fatigue and Its Relationship to Markers of Oxidative Stress. *Integrative Cancer Therapies*, *17*(2), 503-510. doi:10.1177/1534735418766402
- Rhone, P., Bielawski, K., Ziołkowska, K., Rość, D., & Ruszkowska-Ciastek, B. (2019). Low pre-treatment count of circulating endothelial progenitors as a prognostic biomarker of the high risk of breast cancer recurrence. *Journal of Clinical Medicine*, *8*(11). doi:10.3390/jcm8111984

- Rock, C. L., Pande, C., Flatt, S. W., Ying, C., Pakiz, B., Parker, B. A., . . . Nichols, J. F. (2013). Favorable changes in serum estrogens and other biologic factors after weight loss in breast cancer survivors who are overweight or obese. *Clinical Breast Cancer, 13*(3), 188-195. doi:10.1016/j.clbc.2012.12.002
- Rothhammer, A., Sage, E. K., Werner, C., Combs, S. E., & Multhoff, G. (2019). Increased heat shock protein 70 (Hsp70) serum levels and low NK cell counts after radiotherapy - potential markers for predicting breast cancer recurrence? *Radiat Oncol, 14*(1), 78. doi:10.1186/s13014-019-1286-0
- Sestak, I., Dowsett, M., Ferree, S., Baehner, F. L., & Cuzick, J. (2016). Retrospective analysis of molecular scores for the prediction of distant recurrence according to baseline risk factors. *Breast Cancer Res Treat, 159*(1), 71-78. doi:10.1007/s10549-016-3868-y
- Skouroliakou, M., Grosomanidis, D., Massara, P., Kostara, C., Papandreou, P., Ntountaniotis, D., & Xepapadakis, G. (2018). Serum antioxidant capacity, biochemical profile and body composition of breast cancer survivors in a randomized Mediterranean dietary intervention study. *European Journal of Nutrition, 57*(6), 2133-2145. doi:10.1007/s00394-017-1489-9
- Sprod, L. K., Janelsins, M. C., Palesh, O. G., Carroll, J. K., Heckler, C. E., Peppone, L. J., . . . Mustian, K. M. (2012). Health-related quality of life and biomarkers in breast cancer survivors participating in tai chi chuan. *Journal of Cancer Survivorship, 6*(2), 146-154. doi:10.1007/s11764-011-0205-7
- Stoll, B. A. (1996). Diet and exercise regimens to improve breast carcinoma prognosis. *Cancer, 78*(12), 2465-2470. doi:10.1002/(SICI)1097-0142(19961215)78:12<2465::AID-CNCR3>3.0.CO;2-J
- Stolley, M., Sheean, P., Gerber, B., Arroyo, C., Schiffer, L., Banerjee, A., . . . Sharp, L. (2017). Efficacy of a weight loss intervention for african American breast cancer survivors. *Journal of Clinical Oncology, 35*(24), 2820-2828. doi:10.1200/JCO.2016.71.9856
- Študentová, H., Vitásková, D., Šrámek, V., Indráková, J., Adam, T., Juráňová, J., . . . Melichar, B. (2015). Correlations of neutrophil-to-lymphocyte, lymphocyte-to-monocyte and platelet-to-lymphocyte ratios with biomarkers of atherosclerosis risk and inflammatory response in patients with a history of breast cancer. *Pteridines, 26*(4), 161-172. doi:10.1515/pterid-2015-0009
- Thomson, C. A., Stopeck, A. T., Bea, J. W., Cussler, E., Nardi, E., Frey, G., & Thompson, P. A. (2010). Changes in body weight and metabolic indexes in overweight breast cancer survivors enrolled in a randomized trial of low-fat vs. reduced carbohydrate diets. *Nutrition and Cancer, 62*(8), 1142-1152. doi:10.1080/01635581.2010.513803
- Walter, K. R., Ford, M. E., Gregoski, M. J., Kramer, R. M., Knight, K. D., Spruill, L., . . . Turner, D. P. (2019). Advanced glycation end products are elevated in estrogen receptor-positive breast cancer patients, alter response to therapy, and can be targeted by lifestyle intervention. *Breast Cancer Res Treat, 173*(3), 559-571. doi:10.1007/s10549-018-4992-7
- Zhang, J. Y., Liao, Y. H., Lin, Y., Liu, Q., Xie, X. M., Tang, L. Y., & Ren, Z. F. (2019). Effects of tea consumption and the interactions with lipids on breast cancer survival. *Breast Cancer Res Treat, 176*(3), 679-686. doi:10.1007/s10549-019-05253-5
